RESEARCH ARTICLE

# Impact of positive end expiratory pressure on cerebral hemodynamic in paediatric patients with post-traumatic brain swelling treated by surgical decompression

Silvia De Rosa<sup>1,2\*</sup>, Gianluca Villa<sup>3,4</sup>, Paola Franchi<sup>1</sup>, Aldo Mancino<sup>1</sup>, Federica Tosi<sup>1</sup>, Marina Alessandra Martin<sup>2</sup>, Simona Bazzano<sup>2</sup>, Giorgio Conti<sup>1</sup>, Silvia Maria Pulitanò<sup>1</sup>

**1** Department of Anaesthesia and Intensive Care, Catholic University, Rome, Italy, **2** Department of Anaesthesia and Intensive Care, San Bortolo Hospital, Vicenza, Italy, **3** Department of Health Science, Section of Anaesthesiology and Intensive Care, University of Florence, Florence, Italy, **4** Department of Anaesthesiology and Intensive Care, Azienda Ospedaliero Universitaria Careggi, Florence, Italy

\* [derosa.silvia@gmail.com](mailto:derosa.silvia@gmail.com)

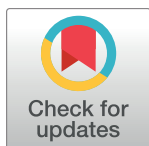

**OPEN ACCESS**

**Citation:** De Rosa S, Villa G, Franchi P, Mancino A, Tosi F, Martin MA, et al. (2018) Impact of positive end expiratory pressure on cerebral hemodynamic in paediatric patients with post-traumatic brain swelling treated by surgical decompression. PLoS ONE 13(5): e0196980. <https://doi.org/10.1371/journal.pone.0196980>

**Editor:** Francesco Staffieri, University of Bari, ITALY

**Received:** September 23, 2017

**Accepted:** April 24, 2018

**Published:** May 10, 2018

**Copyright:** © 2018 De Rosa et al. This is an open access article distributed under the terms of the [Creative Commons Attribution License](https://creativecommons.org/licenses/by/4.0/), which permits unrestricted use, distribution, and reproduction in any medium, provided the original author and source are credited.

**Data Availability Statement:** All relevant data are within the paper and its Supporting Information files.

**Funding:** The authors received no specific funding for this work.

**Competing interests:** The authors have declared that no competing interests exist.

## Abstract

### Introduction

The objective of our present study is to evaluate the impact of different PEEP levels on cerebral hemodynamic, gas exchanges and respiratory system mechanics in paediatric patients with post-traumatic brain swelling treated with decompressive craniectomy (DC).

### Materials and methods

A prospective physiologic study was carried out on 14 paediatric patients presenting with severe traumatic brain swelling treated with DC. Transcranial Doppler ultrasonography was performed on the middle cerebral artery bilaterally after DC. After assessment at ZEEP, intracranial pressure (ICP), cerebral perfusion pressure (CPP), mean arterial pressure (MAP), central venous pressure (CVP) and gas exchanges were recorded at PEEP 4 and PEEP 8.

### Results

From ZEEP to PEEP 8, the compliance of respiratory system indexed to the weight of the patient significantly increased ( $P = 0.02$ ) without ICP modifications. No significant variation of the MAP, CPP, Vmed, the total resistance of respiratory system and ohmic resistance of the respiratory system indexed to the weight of the patients was observed. CVP significantly increased between ZEEP and PEEP 8 ( $P = 0.005$ ), and between PEEP 4 and PEEP 8 ( $P = 0.05$ ).

### Conclusions

PEEP values up to 8 cmH20 seem to be safe in paediatric patients with a severe post-traumatic brain swelling treated with DC.

## Introduction

Traumatic Brain Injury (TBI) is a leading cause of death and disability in children [1,2]. The mechanism of injury in TBI comprises of primary and secondary injuries. The former is the direct consequence of the initial physical insult. Management of severe TBI in critical children secondary brain injury could improve outcome [3]. Although the skull is a rigidly fixed volume compartment, the brain, blood and cerebrospinal fluid (CSF) are relatively incompressible [4]. A steep rise of pressure can affect cerebral blood flow, while secondary insults can arise from systemic factors, hypoxemia and hypotension [5]. The initial mixed metabolic acidosis plus respiratory acidosis and Glasgow Coma Scale Score (GCS) are significant predictors of mortality [6].

Current Brain Trauma recommendations are based on early correction of hypoxemia and avoidance of hypocarbia after severe paediatric TBI [7]. Recruitment manoeuvres with high sustained airway pressures, followed by appropriate positive end-expiratory pressure (PEEP) could be necessary to maintain the recruited alveoli open. High intrathoracic pressure decreases the preload, resulting in diminished cardiac output. Moreover, the impedance of venous blood flow may elevate Intracranial Pressure (ICP) [8]. Increased ICP and brain swelling are the main cause of death in patients with severe TBI. The appropriate treatment of these patients and the balance of benefits and risks represent a complex issue in critical care.

The aim of medical and surgical therapy is to reduce the ICP after TBI: when other treatments have failed, decompressive craniectomy (DC) could allow a rapid decrease of ICP. This procedure allows the relieve intractable intracranial hypertension and/or to prevent or reverse cerebral herniation [9]. The clinical effectiveness of DC in reducing ICP in patients with TBI is under evaluation in current randomized clinical trials, but it has been demonstrated in published clinical investigations [10–13] and in a recent meta-analysis [14]. Although there are a large number of experimental and clinical studies controversy regarding the management of intracranial hypertension and cerebral oedema when a high airway pressure is used [8,15], there is no evidence regarding the effect of PEEP on cerebral hemodynamic post-DC. Literature involving adult patients suggest to consider decompressive craniectomy, evaluating the PEEP effects on the basis of its influence in reducing the effect of Starling's resistor significantly [16]. In paediatric populations this effect is uncertain, and the use of PEEP in this situation remains controversial. To the best of our knowledge, no authors have demonstrated the impact of different PEEP levels on cerebral hemodynamic, gas exchanges, and respiratory system mechanics in paediatric patients with a severe post-traumatic brain swelling treated with DC.

## Materials and methods

The present is a single centre observational study. The Institutional Review Board approved the protocol and written informed consent was obtained from parents. Data were collected prospectively on 14 paediatric patients admitted to paediatric intensive care unit (PICU) of Catholic University Medical School, Rome, Italy, between May 2012 and December 2013. Participants were consecutive emergency department patients after diagnosis of severe post-traumatic brain swelling treated by DC in accordance with a standardised protocol. Inclusion criteria were: age between 4 and 16 years, TBI, DC, and the need for postoperative mechanical ventilation. Exclusion criteria were: age younger than 4 years and older than 16 years, cerebral infectious disease, hemodynamic instability requiring inotropic support, and cerebral disease requiring neurosurgery.

## Patient management

During the study period, patients were resuscitated according to institutional practice, which is consistent with the 2012 TBI Guidelines [7,17]. General approach to severe paediatric TBI

management includes: sedation and analgesia with midazolam (continuous infusion of 3 to 5 mcg/kg/min) and remifentanyl (continuous infusion 0.25 to 0.75 mcg/kg/min); mechanical ventilation was set to provide Volume Control mode (Servo 300; Siemens, Solna, Sweden) and with a fraction of inspired oxygen ( $\text{FiO}_2$ ) 0.3, a square wave, an inspiratory-expiratory ratio of 1:2, a targeted tidal volume of 7–8 mL/kg and a frequency set to keep the partial pressure of carbon dioxide ( $\text{PaCO}_2$ ) at 32 to 36 mmHg; intracranial pressure (ICP) monitoring via intraparenchymal catheter or ventriculostomy, care aimed at maintaining ICP at <20 mmHg, cerebral perfusion pressure (CPP) at > 40 mmHg,  $\text{PaCO}_2$  at 35–40 mmHg,  $\text{SaO}_2$  at >90%; core body temperature maintained between 35 and 37.5°C with antipyretics, cooling/warming blankets, or intravascular cooling devices if needed.

The zero hydrostatic references were chosen at the mid-chest for CVP and mean arterial pressure (MAP), and at the external auditory meatus, corresponding to the foramen of Monroe, for ICP and CPP measurements. The head of the bed was kept at 30 degrees for all children. The middle cerebral artery (MCA) mean velocity (Vmed) of the most affected side was determined by Transcranial Doppler ultrasonography (TCD, Multidop X-4, DWL), using a hand-held probe. During the study period, patients with a CPP value below 50 mmHg, and/or an ICP value over 20 mmHg were excluded. When the absence of spontaneous inspiratory efforts was confirmed, the respiratory mechanics were measured at zero end-expiratory pressure (ZEEP). The end-inspiratory occlusion of 3 seconds was obtained by pressing the end-inspiratory hold knob on the ventilator. The ohmic resistance of the respiratory system ( $\text{RRS}_{\text{min}}$ ), the total resistance of the respiratory system ( $\text{RRS}_{\text{max}}$ ), and the compliance of the respiratory system (Crs) were determined. The  $\text{RRS}_{\text{min}}$  is defined as  $(P_{\text{max}} - P_1) / \text{flow}$  ( $P_{\text{max}}$  is the peak airway pressure at the end of inspiration;  $P_1$  is the pressure value at the rapid initial drop after an occlusion manoeuvre). The  $\text{RRS}_{\text{max}}$  is defined as  $(P_{\text{max}} - P_2) / \text{flow}$  (where  $P_2$  is the pressure value when a plateau is reached after an occlusion manoeuvre longer than 2 s), after subtraction of the value of endotracheal tube resistance. The Crs was calculated as  $\text{TV}_{\text{expired}} / (P_2 - \text{PEEP})$ . Respiratory mechanics data were indexed to the weight of the patients expressed in kg. The following parameters were recorded after 20 minutes: MAP, CVP, ICP, CPP, Vmed, and arterial blood gases. After the ZEEP assessment, the increments of PEEP at four and 8 cm  $\text{H}_2\text{O}$  were applied while the ventilator setting remained unchanged. At each PEEP level, all above-mentioned parameters were recorded (Kleistek ICUlab, Bari, Italy).

## Statistical analysis

Categorical data are presented as percentages, while continuous data as median [25th–75th percentiles]. Considering the pair, not-normal distributed data, the parameters observed at ZEEP for each variable have been compared to those observed at PEEP 4 and PEEP 8 through Friedman test. For those parameters statistically different at Friedman test, a post-hoc analysis with Wilcoxon sign rank test for paired data has been performed between couples of subgroups. A p value of <0.05 was considered statistically significant at Friedman test. Meanwhile p-value adjustment for multiple comparisons (Bonferroni-corrected alphas,  $0.05/3 = 0.02$ ) has been considered for post-hoc analysis. Data were analysed using STATA 9.1 software (STATA Corp, 4905, Lakeway Drive College Station, 77845, Texas, US).

## Results

Fourteen patients were enrolled between May 2012 and December 2013. All patients had a TBI with a severe post-traumatic brain swelling treated with DC (S1 Table). During the study,  $\text{PaCO}_2$  and  $\text{PaO}_2/\text{FiO}_2$  ratio remained unchanged over the study period. No patient dropped out at any stage of the study. In the whole population, the application of PEEP (from ZEEP to

PEEP 8) significantly increased CrsI ( $p = 0.02$ ) without ICP modifications (S2 Table). No significant variation was observed for MAP, CPP, Vmed, RRSmaxI, and RRSminI (S1 Fig). CVP significantly increased between ZEEP and PEEP 8 ( $p = 0.005$ ), and between PEEP 4 and PEEP 8 ( $p = 0.05$ ) (S2 Table). The median CPP values, calculated as the difference between MAP and CVP, were 69.2 [64.3–73.7] mmHg, 69 [64.9–77.8] mmHg, 67.2 [58.1–72.9] respectively for ZEEP, PEEP 4 and PEEP 8. In patients with reduced CrsI, the application of PEEP did not significantly increase CrsI values up to normal value. In patients with normal CrsI, PEEP-induced a significant increase in CrsI between ZEEP to PEEP 4 and ZEEP to PEEP 8 ( $P = 0.02$ ) (S3 Table).

## Discussion

The study suggests the impact of different PEEP levels on cerebral hemodynamic, gas exchanges, respiratory system mechanics in paediatric patients with a severe post-traumatic brain swelling treated with DC. PEEP-induced only modest increases in CVP. The application of different PEEP levels, from ZEEP to PEEP 8, induced a modest variation of CrsI associated with modest increases in CVP without ICP variations but also without effect on gas exchanges, respiratory system mechanics, and intracranial hemodynamics.

In a previous study on children with cerebral neoplasm we demonstrated that PEEP provides changes in cerebral hemodynamics similar to those described for adults. In particular, PEEP-induced only modest increases in CVP (approximately 1 mm Hg from PEEP 4 to PEEP 8) small ICP rises but also without significant effect on gas exchanges, respiratory system mechanics, and intracranial hemodynamics [18]. a closed skull model, downstream pressure for cerebral perfusion is either ICP or CVP, whichever is the higher. However, with increasing PEEP, we found that CVP calibrated to the level of the heart rises from five to 8 mmHg. In our study, CPP calculated as difference between MAP and ICP resulted 70.3 [60; 72.67], 70.83[67.67; 76.33], and 67.5 [61;74]; respectively for ZEEP, PEEP 4 and PEEP 8. Furthermore, the CPP values, calculated as the difference between MAP and CVP but also MAP and CVP, were 69.2 [64.3–73.7] mmHg, 69 [64.9–77.8] mmHg, 67.2 [58.1–72.9], respectively for ZEEP, PEEP 4 and PEEP 8.

Although, statistical analysis has not been performed, at this level of PEEP the CPP values calculated as CVP-ICP and MAP-CVP are similar.

However, the interactions between the respiratory system and intracranial hemodynamic in brain-injured patients are more complex, and the ventilatory management is challenging. Children with severe TBI could present initial mixed metabolic acidosis plus respiratory acidosis [6] and it is advocated the early correction of hypoxemia avoiding hypocarbia. In this scenario, the use of PEEP could improve oxygenation, but it could affect intracranial pressure.

Evidence in the literature demonstrates that, with close monitoring of cerebral and systemic haemodynamics, PEEP can be safely applied and titrated to an optimal level in the management of acute respiratory distress syndrome (ARDS) following traumatic brain injury [19]. High PEEP levels increased brain tissue oxygen pressure and oxygen saturation, without an increase in intracranial pressure or decrease in cerebral perfusion pressure. High PEEP levels can be used as a safe alternative to improve brain oxygenation in patients with severe traumatic brain injury and acute respiratory distress syndrome [20]. However, several studies demonstrate that after TBI, cerebral autoregulation is impaired with a severe risk of hypoperfusion. Paediatric patients have small cisterns, cortical sulci are tight and have small ventricles in proportion to the total intracranial volume. The infant's brain has a reduced intracranial compliance [21]. For this reason, children often develop brain swelling defined as a reduction of cerebrospinal spaces, spaces, particularly the basal cisterns on CT scan [16]. DC could be used to treat intracranial pressure preventing or treating herniation [9].

There is no evidence regarding the effect of PEEP on cerebral hemodynamic post-DC.

In patients with normal compliance, PEEP application may raise right atrium pressure increasing internal jugular vein pressure [22]. On the contrary, in patients with low CrsI, this effect is prevented by “stiff lung phenomenon” [16,23]. Infants have high cardiovascular tolerance to the application of high airway pressures. The volume-pressure relationship of the chest wall is much steeper in the infant. For this reason, relatively large changes in intrathoracic pressure cause small variations in chest wall pressure with a limited effect on pleural pressure [24].

In adult patients, authors suggest that any factor likely to reduce the effect of Starling’s resistor significantly, such as decompressive craniectomy, should be considered in the evaluation of PEEP and any effect on the intracranial system [16].

In paediatric patients with decompressive craniectomy, it is uncertain if a small increase in CVP could increase the jugular bulb pressure (Pj) and if a Starling resistor effect acting between dural sinuses and cerebral veins may have dampened it. In addition, when the head is kept at 30 degrees, the vertebral venous plexus may exert cerebral venous drainage better than the jugular veins [18].

This study has several limitations. First, we assumed that the pressure measured at each point might be the same, but it may not be the same in an open skull. Secondly, we did not perform measurements of cardiac output after PEEP applications. Thirdly, we did not perform retrograde cannulation of the internal jugular vein. Thus, we have not prediction of venous drainage impairment. Fourthly, we did not perform the PEEP assessment in children with an increase in ICP or a decrease in CPP.

Fifthly, the sample size was small, and further studies involve large and better-defined population should be performed to confirm our data.

## Conclusion

In conclusion, in the child aged 4–16 years, post-decompressive craniectomy, who has a stable measured ICP (i.e., <20 mm Hg) and stable measured CPP (i.e., >50 mm Hg), the addition of PEEP up to 8 cm H<sub>2</sub>O does not result in a change in the measurements of ICP or CPP.

Probably, our results could suggest the use of PEEP (up to 8 cm H<sub>2</sub>O) to restore lung recruitment and improve oxygenation in paediatric patients with severe head injuries.

## Supporting information

**S1 Fig. CrsI, gas exchanges, MAP, CVP, CPP and V<sub>med</sub> at ZEEP (in white), PEEP4 (in light gray) and PEEP8 (in dark gray).** \* Statistical significance respect to ZEEP.

† Statistical significance between PEEP4 and PEEP 8.

(JPG)

**S1 Table. Demographic, clinical, and imaging characteristics of patients with severe brain injury who underwent decompressive craniectomy.** BA: Bicycle Accident; GCS: Glasgow Coma Score; MVA: Motor Vehicle Accident; PA: Pedestrian Accident; ST: Sport Trauma. (DOCX)

**S2 Table. Respiratory mechanics data, MAP, CVP, arterial blood gases, ICP, CPP and V<sub>med</sub> at different PEEP level.** \* Statistical significance respect to ZEEP.

† Statistical significance between PEEP4 and PEEP 8.

(DOCX)

**S3 Table. Indexed compliance of respiratory system at different Peep levels in-group with low compliance and normal compliance.** \* Statistical significance respect to ZEEP. (DOCX)

## Acknowledgments

The authors thank Dr. Ian Baldwin for editing the manuscript.

## Author Contributions

**Conceptualization:** Silvia De Rosa, Paola Franchi, Giorgio Conti, Silvia Maria Pulitanò.

**Data curation:** Silvia De Rosa, Gianluca Villa, Aldo Mancino, Federica Tosi, Simona Bazzano.

**Formal analysis:** Gianluca Villa.

**Investigation:** Silvia De Rosa.

**Methodology:** Silvia De Rosa.

**Project administration:** Silvia De Rosa.

**Software:** Gianluca Villa, Aldo Mancino.

**Writing – original draft:** Silvia De Rosa, Giorgio Conti, Silvia Maria Pulitanò.

**Writing – review & editing:** Silvia De Rosa, Gianluca Villa, Paola Franchi, Federica Tosi, Marina Alessandra Martin, Simona Bazzano, Giorgio Conti, Silvia Maria Pulitanò.

## References

1. Tepas JJ. 3rd, DiScala C, Ramenofsky ML and Barlow B. Mortality and head injury: the pediatric perspective. *J Pediatr Surg.* 1990; 25, 92–95; discussion 96. PMID: [2299551](https://pubmed.ncbi.nlm.nih.gov/2299551/)
2. Langlois JA., Rutland-Brown W and Thomas KE. The incidence of traumatic brain injury among children in the United States: differences by race. *J Head Trauma Rehabil.* 2005; 20, 229–238. PMID: [15908823](https://pubmed.ncbi.nlm.nih.gov/15908823/)
3. Agrawal S, Branco RG. Neuroprotective measures in children with traumatic brain injury. *World J Crit Care Med.* 2016 Feb 4; 5(1):36–46. <https://doi.org/10.5492/wjccm.v5.i1.36> PMID: [26855892](https://pubmed.ncbi.nlm.nih.gov/26855892/)
4. Andrews PJ, Citerio G. Intracranial pressure. Part one: historical overview and basic concepts. *Intensive Care Med.* 2004; 30:1730–1733. <https://doi.org/10.1007/s00134-004-2376-4> PMID: [15243684](https://pubmed.ncbi.nlm.nih.gov/15243684/)
5. Chesnut RM, Marshall LF, Klauber MR, Blunt BA, Baldwin N, Eisenberg HM, et al. The role of secondary brain injury in determining outcome from severe head injury. *J Trauma.* 1993 Feb; 34(2):216–22 PMID: [8459458](https://pubmed.ncbi.nlm.nih.gov/8459458/)
6. Rahimi S, Bidabadi E, Mashouf M, Seyed Saadat SM and Rahimi S. Prognostic value of arterial blood gas disturbances for in-hospital mortality in pediatric patients with severe traumatic brain injury. *Acta Neurochir (Wien).* 2014; 156, 187–192.
7. Kochanek PM, Carney N, Adelson PD, Ashwal S, Bell MJ, Bratton S, et al; American Academy of Pediatrics-Section on Neurological Surgery; American Association of Neurological Surgeons/Congress of Neurological Surgeons; Child Neurology Society; European Society of Pediatric and Neonatal Intensive Care; Neurocritical Care Society; Pediatric Neurocritical Care Research Group; Society of Critical Care Medicine; Paediatric Intensive Care Society UK; Society for Neuroscience in Anesthesiology and Critical Care; World Federation of Pediatric Intensive and Critical Care Societies. Guidelines for the acute medical management of severe traumatic brain injury in infants, children, and adolescents—second edition. *Pediatr Crit Care Med.* 2012 Jan; 13 Suppl 1:S1–8.
8. Bein T, Kuhr LP, Bele S, Ploner F, Keyl C, Taeger. Lung recruitment maneuver in patients with cerebral injury: effects on intracranial pressure and cerebral metabolism. *Intensive Care Med.* 2002; 28, 554–558. <https://doi.org/10.1007/s00134-002-1273-y> PMID: [12029401](https://pubmed.ncbi.nlm.nih.gov/12029401/)
9. Cooper DJ, Rosenfeld JV, Murray L, Arabi YM, Davies AR, D'Urso P, et al. Investigators, D.T., Australian and New Zealand Intensive Care Society Clinical Trials, G. Decompressive craniectomy in diffuse traumatic brain injury. *N Engl J Med.* 2011; 364, 1493–1502. <https://doi.org/10.1056/NEJMoa1102077> PMID: [21434843](https://pubmed.ncbi.nlm.nih.gov/21434843/)

10. Bao YH, Liang YM, Gao GY, Pan YH, Luo QZ, Jiang JY. Bilateral decompressive craniectomy for patients with malignant diffuse brain swelling after severe traumatic brain injury: a 37-case study. *J Neurotrauma*. 2010; 27, 341–347. <https://doi.org/10.1089/neu.2009.1040> PMID: 19715392
11. Bor-Seng-Shu E, Hirsch R, Teixeira MJ, De Andrade AF, Marino R Jr. Cerebral hemodynamic changes gauged by transcranial Doppler ultrasonography in patients with posttraumatic brain swelling treated by surgical decompression. *J Neurosurg*. 2006; 104, 93–100. <https://doi.org/10.3171/jns.2006.104.1.93> PMID: 16509152
12. Daboussi A, Minville V, Leclerc-Foucras S, Geeraerts T, Esquerré JP, Payoux P, Fourcade O. Cerebral hemodynamic changes in severe head injury patients undergoing decompressive craniectomy. *J Neurosurg Anesthesiol*. 2009; 21, 339–345. <https://doi.org/10.1097/ANA.0b013e3181b1dbba> PMID: 19955897
13. Hutchinson P, Kollias AG, Timofeev IS, Corteen EA, Czosnyka M, Timothy J, et al. Trial of decompressive craniectomy for traumatic intracranial hypertension. *N Engl J Med*. 2016; 375:1119–1130. <https://doi.org/10.1056/NEJMoa1605215> PMID: 27602507
14. Bor-Seng-Shu E, Figueiredo EG, Amorim RL, Teixeira MJ, Valbuza JS, de Oliveira MM et al. Decompressive craniectomy: a meta-analysis of influences on intracranial pressure and cerebral perfusion pressure in the treatment of traumatic brain injury. *J Neurosurg*. 2012; 117, 589–596. <https://doi.org/10.3171/2012.6.JNS101400> PMID: 22794321
15. Wolf S, Schurer L, Trost HA and Lumenta CB. The safety of the open lung approach in neurosurgical patients. *Acta Neurochir*. 2012; Suppl 81, 99–101.
16. Caricato A, Conti G, Della Corte F, Mancino A, Santilli F, Sandroni C, et al. Effects of PEEP on the intracranial system of patients with head injury and subarachnoid hemorrhage: the role of respiratory system compliance. *J Trauma*. 2005; 58, 571–576. PMID: 15761353
17. Adelson PD, Bratton SL, Carney NA, Chesnut RM, du Coudray HE, Goldstein B, et al. American Association for Surgery of, T., Child Neurology, S., International Society for Pediatric, N., International Trauma, A., Critical Care, S., Society of Critical Care, M., World Federation of Pediatric, I. and Critical Care, S. Guidelines for the acute medical management of severe traumatic brain injury in infants, children, and adolescents. Chapter 11. Use of hyperosmolar therapy in the management of severe pediatric traumatic brain injury. *Pediatr Crit Care Med*. 2003; 4, S40–44. PMID: 12847347
18. Pulitano S., Mancino A., Pietrini D., Piastra M., De Rosa S., Tosi F., De Luca D. and Conti G. Effects of positive end expiratory pressure (PEEP) on intracranial and cerebral perfusion pressure in pediatric neurosurgical patients. *J Neurosurg Anesthesiol*. 2013; 25, 330–334. <https://doi.org/10.1097/ANA.0b013e31828bac4d> PMID: 23519374
19. Lou M, Xue F, Chen L, Xue Y, Wang K. Is high PEEP ventilation strategy safe for acute respiratory distress syndrome after severe traumatic brain injury? *Brain Inj*. 2012; 26(6):887–90. <https://doi.org/10.3109/02699052.2012.660514> PMID: 22583180
20. Nemer SN, Caldeira JB, Santos RG, Guimarães BL, Garcia JM, Prado D, et al. Effects of positive end-expiratory pressure on brain tissue oxygen pressure of severe traumatic brain injury patients with acute respiratory distress syndrome: A pilot study. *J Crit Care*. 2015 Dec; 30 (6):1263–6. <https://doi.org/10.1016/j.jcrc.2015.07.019> PMID: 26307004
21. Togioka BM, Arnold MA, Bathurst MA, Ziegfeld SM, Nabaweesi R, Colombani PM, et al. Retinal hemorrhages and shaken baby syndrome: an evidence-based review. *J Emerg Med*. 2009; 37, 98–106. <https://doi.org/10.1016/j.jemermed.2008.06.022> PMID: 19081701
22. Lee B. and Newberg A. Neuroimaging in traumatic brain imaging. *NeuroRx*. 2005; 2, 372–383. <https://doi.org/10.1602/neurorx.2.2.372> PMID: 15897957
23. Huynh T, Messer M, Sing RF, Miles W, Jacobs DG and Thomason MH. Positive end-expiratory pressure alters intracranial and cerebral perfusion pressure in severe traumatic brain injury. *J Trauma*. 2002; 53,488–492. <https://doi.org/10.1097/01.TA.0000025657.37314.2F> PMID: 12352486
24. Kaditis AG, Motoyama EK, Zin W, Maekawa N, Nishio I, Imai T et al. The effect of lung expansion and positive end-expiratory pressure on respiratory mechanics in anesthetized children. *Anesth Analg*. 2008; 106, 775–785. <https://doi.org/10.1213/ane.0b013e318162c20a> PMID: 18292419
